# Supplementary material
Source: MDPI journal article supplement (https://www.mdpi.com/2313-0105/9/5/276)
Supplement: s1 [file s1]

## Supporting Information

### Hybrid Ionically-Covalently Cross-linked Network Binder for High-Performance Silicon Anodes in Lithium-Ion Batteries

Xuejian Zeng<sup>1,2</sup>, Hongyan Yue<sup>1</sup>, JiNa Wu<sup>2</sup>, Chao Chen<sup>2,3,4\*</sup>, Lichun Liu<sup>2,5\*</sup>

<sup>1</sup> School of Materials Science and Chemical Engineering, Harbin University of Science and Technology, Harbin 150040, People's Republic of China; 2120210121@stu.hrbust.edu.cn (X.Z.); hyyue@hrbust.edu.cn (H.Y.)

<sup>2</sup> Nanotechnology Research Institute, Jiaying University, Jiaying 314001, China; 20070305010@smail.cczu.edu.cn

<sup>3</sup> Key Laboratory of Yarn Materials Forming and Composite Processing Technology of Zhejiang Province, Jiaying University, Jiaying 314001, China

<sup>4</sup> Shanghai Institute of Applied Physics, Chinese Academy of Sciences, Shanghai 201800, China

<sup>5</sup> College of Biological, Chemical Sciences and Engineering, Jiaying University, Jiaying 314001, China

\* Correspondence: chaochen@zjxu.edu.cn (C.C.); lichun.liu@zjxu.edu.cn (L.L.)

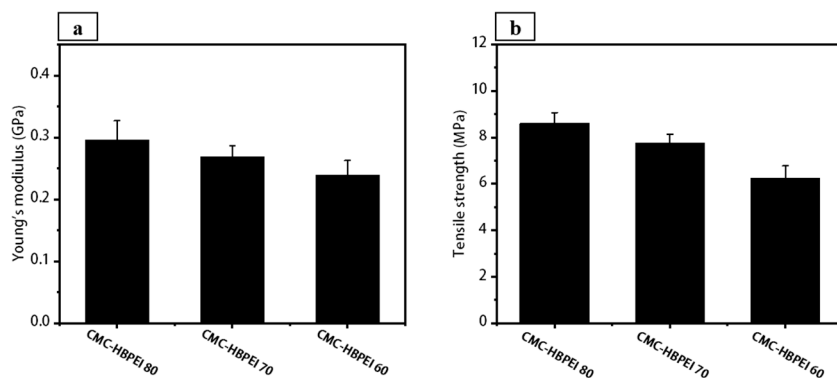

**Figure S1.** Young's modulus (a) and tensile strength (b) of the reconnected films CMC-HBPEI-80, CMC-HBPEI-70, CMC-HBPEI-60

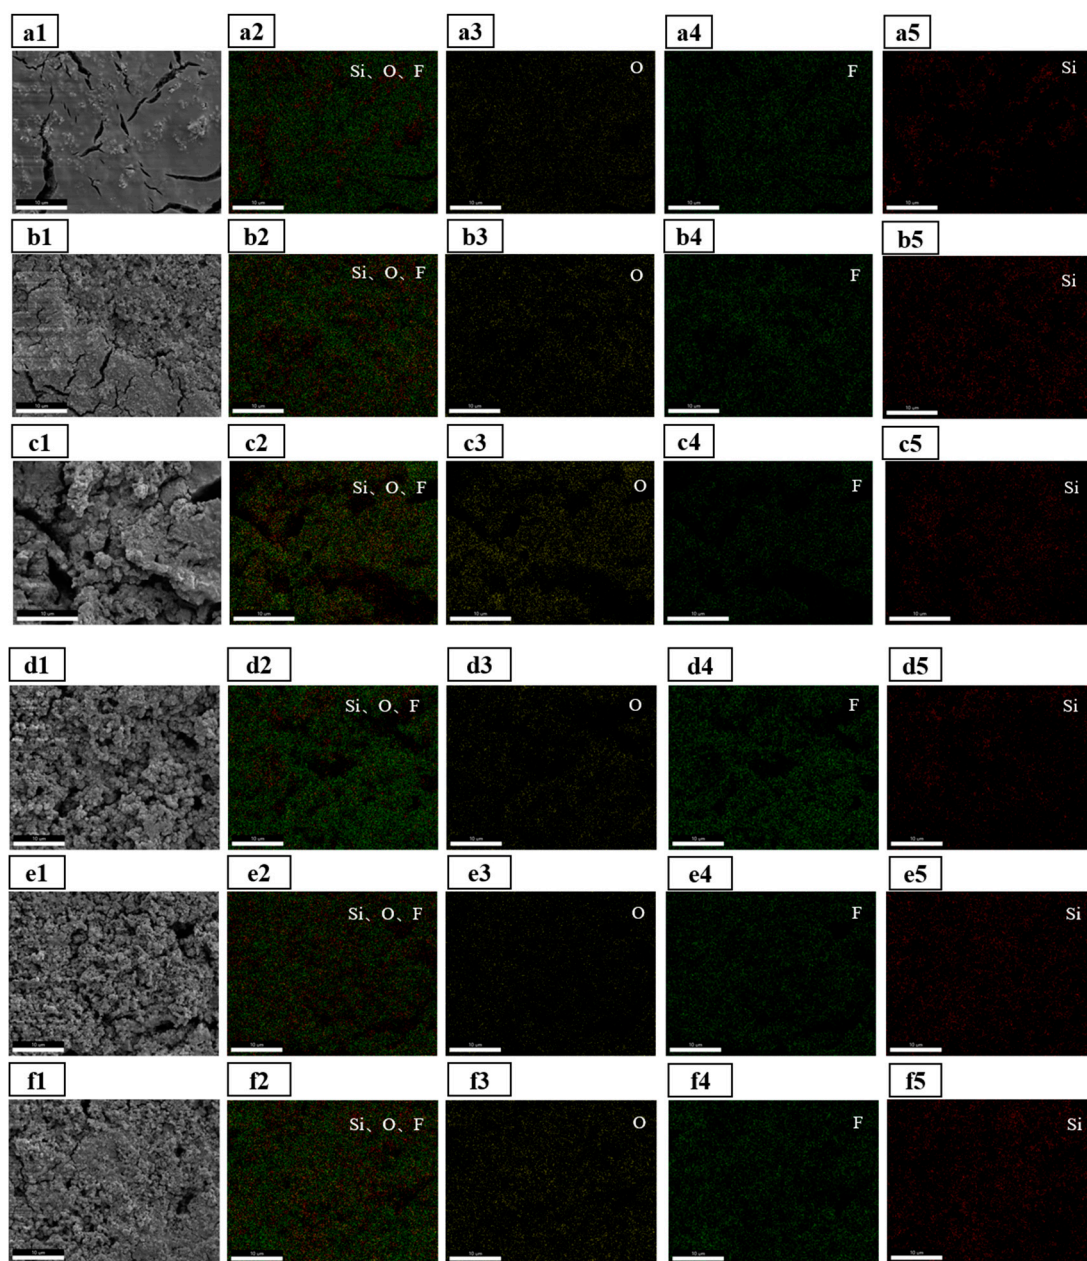

**Figure S2.** SEM-EDX images of the distribution of different elements after 100 cycles: Si/HBPEI (a), Si/CMC (b), Si/CMC-HBPEI 60 (c), Si/CMC-HBPEI 70 (d), Si/CMC-HBPEI 80 (e) and Si/CMC-HBPEI 90 (f)

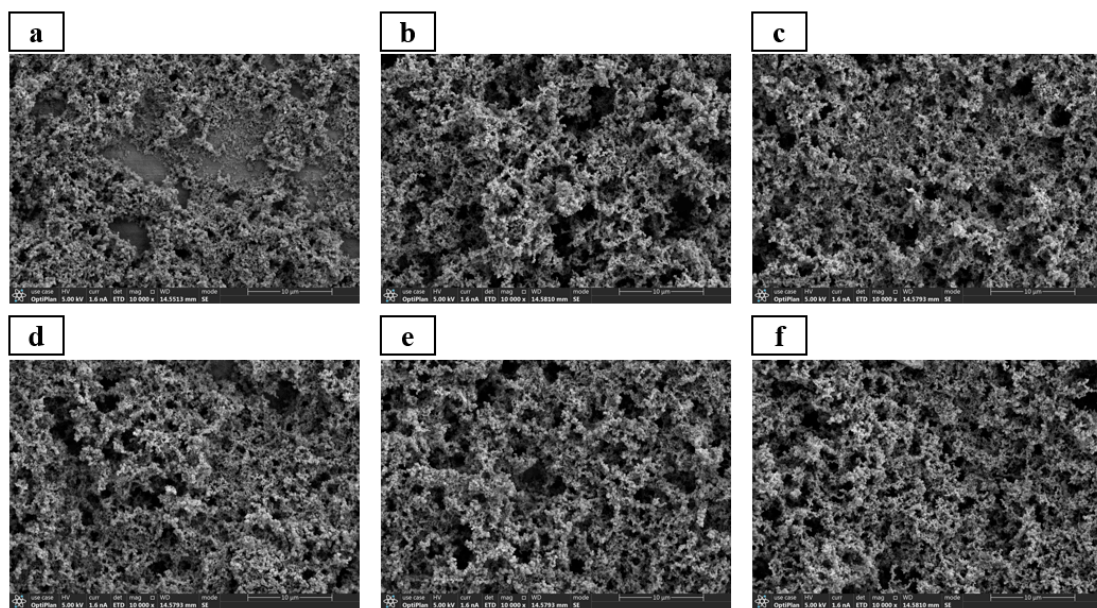

**Figure S3.** SEM images of Si/HBPEI (a), Si/CMC (b), Si/CMC-HBPEI 60 (c), Si/CMC-HBPEI 70 (d), Si/CMC-HBPEI 80 (e) and Si/CMC-HBPEI 90 (f) anodes before 100 cycles.

**Table S1.** Cycle performance of Si based anodes with different polymer binders

| Binder                                   | CMC-HBPEI-82            | PAA [46]                | PVA [47]                | CS [48]                 | Karaya Gum [49]         | Alg [50]                | Lignin [51]             | SHP [52]                |
|------------------------------------------|-------------------------|-------------------------|-------------------------|-------------------------|-------------------------|-------------------------|-------------------------|-------------------------|
| Specific capacity (mAh g <sup>-1</sup> ) | 2720                    | 3200                    | 2479                    | 2842                    | 2421                    | 2625                    | 1820                    | 2600                    |
| Capacity Retention (%)                   | 75 (100 <sup>th</sup> ) | 59 (100 <sup>th</sup> ) | 41 (100 <sup>th</sup> ) | 52 (100 <sup>th</sup> ) | 80 (150 <sup>th</sup> ) | 15 (100 <sup>th</sup> ) | 64 (100 <sup>th</sup> ) | 80 (150 <sup>th</sup> ) |
